# Supplementary material
Source: HighWire-hosted journal article supplement (https://qualitysafety.bmj.com/content/30/11/867)
Supplement: inline-supplementary-material-1 [file inline-supplementary-material-1.pdf]

---

**Online Supporting Material**

---

**1 ONLINE SUPPLEMENT**

2

3 Title: The effectiveness of chest pain centre accreditation on the management of acute  
4 coronary syndrome: a retrospective study using a national database

5 Contents

6 Supplementary table 1. Definition of ACS and AMI using ICD

7 Supplementary table 2. Characteristics of ACS patients stratified by chest pain center  
8 accreditation status

9 Supplementary table 3. The association of in-hospital mortality and management and  
10 chest pain centre accreditation in all hospitals

11 Supplementary table 4. The association of in-hospital mortality and management and  
12 chest pain centre accreditation statuses in accredited hospitals

13

14

15

16

17

18

19

20

21

22

23

24

### Online Supporting Material

#### 25 Supplementary table 1. Definition of ACS and AMI using ICD

| <b>Disease</b> | National Clinical Edition 1.1 | National RC020-ICD-10 | Beijing RC020-ICD-10 |
|----------------|-------------------------------|-----------------------|----------------------|
| <b>AMI</b>     | I21                           | I21                   | I21                  |
|                | I22                           | I22                   | I22                  |
| <b>ACS</b>     | I21                           | I21                   | I21                  |
|                | I22                           | I22                   | I22                  |
|                | I20.000                       | I20.000               | I20.001              |
|                | I20.001                       | I20.001               | I20.005              |
|                | I20.002                       | I20.002               | I20.004              |
|                | I20.003                       | I20.003               | I20.003              |
|                | I20.004                       | I20.004               | I20.006              |
|                | I20.005                       | I20.005               | I20.802              |
|                | I20.006                       | I20.006               | I20.002              |
|                | I20.100                       | I20.804               | I20.803              |
|                | I20.101                       | I20.101               | I20.102              |
|                | I20.102                       | I20.102               | I20.101              |
|                | I20.800x003                   | I20.100               | I20.806              |
|                | I20.800x006                   | I24.800               | I24.802              |
|                | I24.900                       | I24.801               | I24.901              |
|                | I24.901                       | I24.900               | I24.803              |
|                | I24.800                       | I24.901               |                      |
|                | I24.801                       |                       |                      |
|                | I24.900x001                   |                       |                      |
| I24.800x007    |                               |                       |                      |

### Online Supporting Material

26 Supplementary table 2. characteristics of ACS patients stratified by chest pain center  
27 accreditation status

| Characteristics           | Total        | before<br>accreditation | undergoing<br>accreditation | after<br>accreditation |
|---------------------------|--------------|-------------------------|-----------------------------|------------------------|
| N                         | 201038       | 96150                   | 28029                       | 76859                  |
| Female                    | 72718(36.2)  | 35084(36.5)             | 9833(35.1)                  | 27801(36.2)            |
| Age                       | 63.6±12.0    | 63.9±12.1               | 63.6±12.1                   | 63.3±11.9              |
| Comorbidities             |              |                         |                             |                        |
| HTN                       | 114437(56.9) | 54882(57.1)             | 15828(56.5)                 | 43727(56.9)            |
| DM                        | 50969(25.4)  | 24000(25.0)             | 6883(24.6)                  | 20086(26.1)            |
| HF                        | 48527(24.1)  | 21412(22.3)             | 6430(22.9)                  | 20685(26.9)            |
| CKD                       | 14811(7.4)   | 5408(5.6)               | 1706(6.1)                   | 7697(10.0)             |
| OMI                       | 15467(7.7)   | 7745(8.1)               | 2080(7.4)                   | 5642(7.3)              |
| Region                    |              |                         |                             |                        |
| Eastern                   | 52908(26.3)  | 30229(31.4)             | 7137(25.5)                  | 15542(20.2)            |
| Western                   | 38859(19.3)  | 19812(20.6)             | 5904(21.1)                  | 13142(17.1)            |
| Central                   | 109272(54.4) | 46109(48.0)             | 14988(53.5)                 | 48175(62.7)            |
| Hospital type,<br>No. (%) |              |                         |                             |                        |
| Specialized               | 33542(16.7)  | 14059(14.6)             | 4689(16.7)                  | 14794(19.2)            |
| Grade IIIA                | 179959(89.5) | 86941(90.4)             | 24831(88.6)                 | 68187(88.7)            |

28 \* The differences between different accreditation status were compared using  
29 ANOVA tests, signed rank tests, or chi-square tests, accordingly; HTN, hypertension;  
30 CHD, coronary heart disease; CKD, chronic kidney disease; HF, heart failure; DM,  
31 diabetes mellitus.

32

33

34

### Online Supporting Material

35 Supplementary table 3. The association of in-hospital mortality and management and  
 36 chest pain centre accreditation in all hospitals (patient last ACS admission during  
 37 2013-2016 was used)\*

| Endings or treatment<br>procedures | Crude model |             | Adjusted model |             |
|------------------------------------|-------------|-------------|----------------|-------------|
|                                    | OR          | 95%CI       | OR             | 95%CI       |
| <b>ACS</b>                         |             |             |                |             |
| In-hospital death                  | 0.70        | (0.53,0.93) | 0.73           | (0.55,0.97) |
| Length of stay                     | 0.89        | (0.84,0.94) | 0.88           | (0.84,0.93) |
| Total charge                       | 1.31        | (1.14,1.52) | 1.04           | (0.93,1.16) |
| PCI                                | 3.76        | (2.67,5.30) | 3.68           | (2.30,5.90) |
| <b>AMI</b>                         |             |             |                |             |
| In-hospital death                  | 0.67        | (0.51,0.87) | 0.68           | (0.52,0.90) |
| Length of stay                     | 0.90        | (0.85,0.96) | 0.90           | (0.85,0.95) |
| Total charge                       | 1.25        | (1.10,1.42) | 1.05           | (0.94,1.16) |
| PCI                                | 3.36        | (2.15,5.26) | 3.61           | (2.18,5.99) |

38 Mixed-effect models were used in the analysis to control for hospital-associated  
 39 random effects, a logistic regression model was used for the in-hospital death  
 40 endpoint, a negative binomial model was used for the length-of stay endpoint, and a  
 41 generalised linear model with a log link and  $\gamma$  distribution was used for the charges  
 42 endpoint. Adjusted for sex, age, comorbidities (hypertension, diabetes, heart failure,  
 43 and old myocardial infarction), types and ranks of hospitals, and geographical region  
 44 (for total charge, percutaneous coronary intervention was also adjusted for).

45 OR, odds ratio; CI, confidence interval; ACS, acute coronary syndrome; AMI, acute  
 46 myocardial infarction; PCI, percutaneous coronary intervention.

### Online Supporting Material

Supplementary table 4. The association of in-hospital mortality and management and chest pain centre accreditation statuses in accredited hospitals (patient last ACS admission during 2013-2016 was used)\*

| Endings or treatment procedures | before accreditation | undergoing accreditation |             | After accreditation |             | undergoing or after accreditation |             |
|---------------------------------|----------------------|--------------------------|-------------|---------------------|-------------|-----------------------------------|-------------|
|                                 |                      | OR                       | 95%CI       | OR                  | 95%CI       | OR                                | 95%CI       |
| <b>ACS</b>                      |                      |                          |             |                     |             |                                   |             |
| In-hospital death               | ref                  | 0.84                     | (0.78,0.91) | 0.83                | (0.78,0.89) | 0.84                              | (0.79,0.89) |
| Length of stay                  | ref                  | 0.94                     | (0.93,0.95) | 0.89                | (0.89,0.90) | 0.91                              | (0.90,0.92) |
| Total charge                    | ref                  | 0.99                     | (0.98,1.00) | 0.97                | (0.96,0.98) | 0.98                              | (0.97,0.98) |
| PCI                             | ref                  | 1.18                     | (1.15,1.22) | 1.31                | (1.28,1.34) | 1.27                              | (1.24,1.29) |
| <b>AMI</b>                      |                      |                          |             |                     |             |                                   |             |
| In-hospital death               | ref                  | 0.85                     | (0.77,0.93) | 0.87                | (0.81,0.94) | 0.86                              | (0.81,0.92) |
| Length of stay, day             | ref                  | 0.94                     | (0.93,0.95) | 0.89                | (0.88,0.89) | 0.91                              | (0.90,0.91) |
| Total charge                    | ref                  | 1.01                     | (0.99,1.02) | 0.98                | (0.97,1.00) | 0.99                              | (0.98,1.00) |
| PCI                             | ref                  | 1.30                     | (1.24,1.35) | 1.47                | (1.41,1.52) | 1.40                              | (1.36,1.45) |

\*Mixed-effect models were used in the analysis to control for hospital-associated random effects, a logistic regression model was used for the in-hospital death endpoint, a negative binomial model was used for the length-of stay endpoint, and a generalised linear model with a log link and  $\gamma$  distribution was used for the charges endpoint. Adjusted for sex, age, comorbidities (hypertension, diabetes, heart failure, and old myocardial infarction), types and ranks of hospitals, and geographical region (for total charge, percutaneous coronary intervention was also adjusted for).

OR, odds ratio; CI, confidence interval; ACS, acute coronary syndrome; AMI, acute myocardial infarction; PCI, percutaneous coronary intervention.
